# Supplementary material for: Global, regional, and national burden of blindness and vision loss due to common eye diseases along with its attributable risk factors from 1990 to 2019: a systematic analysis from the global burden of disease study 2019
Source: publisher site journal article supplement (doi:10.18632/aging.203374), 2021-08-09
Supplement: Supplementary file [file aging-v13i15-203374-supplementary-material-SD2.pdf]

## SUPPLEMENTARY TABLES

**Supplementary Table 1. Prevalence cases and age-standardized prevalence rate per 100 people for all blindness and vision loss in 1990 and 2019, and its estimated annual percentage change from 1990 to 2019.**

| Characteristics                  | 1990                                             |                              | 2019                                             |                              | EAPC in ASPR,             |
|----------------------------------|--------------------------------------------------|------------------------------|--------------------------------------------------|------------------------------|---------------------------|
|                                  | Prevalence cases<br>No.×10 <sup>6</sup> (95% UI) | ASPR per 100<br>No. (95% UI) | Prevalence cases<br>No.×10 <sup>6</sup> (95% UI) | ASPR per 100<br>No. (95% UI) | 1990-2019<br>No. (95% CI) |
| <b>Overall</b>                   | 353.2 (298.7, 414.0)                             | 8.43 (7.07, 9.86)            | 713.9 (593.2, 841.1)                             | 8.69 (7.27, 10.22)           | 0.02 (-0.02, 0.06)        |
| <b>Sex</b>                       |                                                  |                              |                                                  |                              |                           |
| Males                            | 162.2 (136.6, 191.2)                             | 8.18 (6.88, 9.61)            | 323.6 (268.9, 383.8)                             | 8.25 (6.91, 9.73)            | -0.06 (-0.10, -0.02)*     |
| Females                          | 190.9 (161.4, 222.6)                             | 8.67 (7.29, 10.11)           | 390.4 (325.0, 458.9)                             | 9.10 (7.61, 10.68)           | 0.09 (0.05, 0.12)*        |
| <b>SDI</b>                       |                                                  |                              |                                                  |                              |                           |
| High SDI                         | 28.30 (24.92, 32.03)                             | 2.97 (2.63, 3.34)            | 47.11 (41.14, 53.83)                             | 3.08 (2.72, 3.48)            | 0.12 (0.09, 0.15)*        |
| High-middle SDI                  | 85.69 (70.93, 102.1)                             | 8.00 (6.67, 9.50)            | 162.5 (133.2, 194.6)                             | 8.31 (6.90, 9.88)            | 0.04 (0.00, 0.09)*        |
| Middle SDI                       | 111.8 (93.78, 132.0)                             | 10.12 (8.44, 11.92)          | 247.0 (204.3, 293.6)                             | 9.82 (8.22, 11.61)           | -0.19 (-0.23, -0.14)*     |
| Low-middle SDI                   | 90.84 (76.88, 106.5)                             | 13.57 (11.47, 15.79)         | 179.8 (149.2, 213.2)                             | 12.5 (10.45, 14.73)          | -0.35 (-0.39, -0.31)*     |
| Low SDI                          | 36.40 (30.48, 42.71)                             | 13.63 (11.43, 15.95)         | 77.22 (65.04, 90.76)                             | 13.13 (10.98, 15.37)         | -0.19 (-0.25, -0.14)*     |
| <b>GBD region</b>                |                                                  |                              |                                                  |                              |                           |
| High-income Asia Pacific         | 4.14 (3.71, 4.59)                                | 2.25 (2.03, 2.48)            | 7.26 (6.47, 8.11)                                | 2.21 (1.99, 2.44)            | -0.06 (-0.08, -0.04)*     |
| High-income North America        | 7.54 (6.65, 8.54)                                | 2.32 (2.05, 2.62)            | 11.91 (10.39, 13.61)                             | 2.31 (2.04, 2.61)            | -0.01 (-0.03, 0.02)       |
| Western Europe                   | 14.40 (13.03, 15.89)                             | 2.98 (2.70, 3.26)            | 19.60 (17.66, 21.68)                             | 2.87 (2.59, 3.15)            | -0.11 (-0.12, -0.10)*     |
| Australasia                      | 0.62 (0.57, 0.68)                                | 2.86 (2.61, 3.12)            | 1.04 (0.92, 1.17)                                | 2.64 (2.35, 2.94)            | -0.25 (-0.32, -0.19)*     |
| Tropical Latin America           | 8.68 (7.66, 9.77)                                | 8.16 (7.15, 9.32)            | 17.90 (15.61, 20.43)                             | 7.55 (6.60, 8.62)            | -0.03 (-0.10, 0.04)       |
| Andean Latin America             | 2.17 (1.90, 2.46)                                | 9.15 (7.95, 10.50)           | 4.93 (4.25, 5.66)                                | 8.56 (7.38, 9.87)            | -0.27 (-0.30, -0.24)*     |
| Central Latin America            | 8.61 (7.43, 9.96)                                | 8.98 (7.62, 10.56)           | 20.40 (17.20, 24.06)                             | 8.55 (7.22, 10.11)           | -0.18 (-0.19, -0.17)*     |
| *Southern Latin America          | 1.63 (1.48, 1.80)                                | 3.48 (3.16, 3.82)            | 2.52 (2.28, 2.78)                                | 3.32 (3.01, 3.65)            | -0.14 (-0.15, -0.13)*     |
| Caribbean                        | 2.27 (1.91, 2.69)                                | 8.26 (6.89, 9.86)            | 3.95 (3.27, 4.72)                                | 7.72 (6.43, 9.21)            | -0.25 (-0.26, -0.23)*     |
| Eastern Europe                   | 25.92 (21.28, 31.08)                             | 9.61 (7.95, 11.45)           | 33.05 (26.85, 40.07)                             | 10.1 (8.27, 12.13)           | 0.03 (-0.03, 0.09)        |
| Central Europe                   | 11.17 (8.88, 13.89)                              | 7.79 (6.25, 9.64)            | 14.84 (11.75, 18.68)                             | 7.37 (5.92, 9.13)            | -0.19 (-0.20, -0.17)*     |
| Central Asia                     | 4.65 (3.87, 5.51)                                | 9.64 (7.97, 11.45)           | 6.93 (5.71, 8.3)                                 | 9.25 (7.67, 11.11)           | -0.16 (-0.17, -0.15)*     |
| North Africa and Middle East     | 15.98 (14.19, 17.84)                             | 7.92 (6.99, 8.95)            | 32.49 (28.62, 36.58)                             | 7.04 (6.19, 8.00)            | -0.39 (-0.40, -0.38)*     |
| South Asia                       | 104.7 (89.03, 122.1)                             | 16.14 (13.75, 18.72)         | 224.1 (187.5, 265.6)                             | 15.00 (12.58, 17.61)         | -0.34 (-0.39, -0.29)*     |
| Southeast Asia                   | 26.88 (23.47, 30.48)                             | 9.64 (8.41, 10.96)           | 52.77 (45.5, 60.45)                              | 8.67 (7.54, 9.95)            | -0.38 (-0.39, -0.36)*     |
| East Asia                        | 84.75 (67.36, 104.5)                             | 9.44 (7.56, 11.57)           | 195.9 (155.6, 240.3)                             | 9.47 (7.66, 11.49)           | -0.12 (-0.19, -0.05)*     |
| Oceania                          | 0.32 (0.27, 0.37)                                | 9.72 (8.28, 11.36)           | 0.73 (0.62, 0.85)                                | 9.55 (8.14, 11.15)           | -0.07 (-0.11, -0.04)*     |
| Western Sub-Saharan Africa       | 10.99 (9.06, 13.19)                              | 11.38 (9.35, 13.64)          | 26.13 (21.62, 31.21)                             | 12.00 (9.92, 14.34)          | -0.03 (-0.14, 0.08)*      |
| Eastern Sub-Saharan Africa       | 10.35 (8.45, 12.3)                               | 12.49 (10.22, 14.89)         | 21.47 (17.69, 25.53)                             | 11.62 (9.57, 13.76)          | -0.24 (-0.26, -0.23)*     |
| Central Sub-Saharan Africa       | 2.55 (2.01, 3.17)                                | 10.38 (8.13, 12.84)          | 5.80 (4.60, 7.24)                                | 9.89 (7.85, 12.30)           | -0.16 (-0.21, -0.11)*     |
| Southern Sub-Saharan Africa      | 4.88 (3.88, 5.96)                                | 16.18 (12.77, 19.68)         | 10.20 (8.00, 12.49)                              | 16.48 (13.05, 20.19)         | -0.08 (-0.15, -0.01)*     |
| <b>Specific subtypes</b>         |                                                  |                              |                                                  |                              |                           |
| Glaucoma                         | 3.88 (3.30, 4.54)                                | 0.11 (0.09, 0.13)            | 7.47 (6.35, 8.77)                                | 0.09 (0.08, 0.11)            | -0.55 (-0.61, -0.50)*     |
| Cataract                         | 42.34 (37.73, 47.62)                             | 1.15 (1.03, 1.29)            | 97.02 (85.37, 109.7)                             | 1.21 (1.07, 1.36)            | 0.41 (0.32, 0.50)*        |
| Age-related macular degeneration | 3.58 (3.03, 4.19)                                | 0.10 (0.08, 0.11)            | 7.79 (6.53, 9.16)                                | 0.10 (0.08, 0.11)            | -0.15 (-0.20, -0.11)*     |
| Refraction disorders             | 97.61 (87.51, 108.5)                             | 2.08 (1.87, 2.31)            | 157.4 (140.9, 174.9)                             | 1.96 (1.75, 2.18)            | -0.25 (-0.28, -0.22)*     |
| Near vision loss                 | 227.2 (164.2, 298.4)                             | 5.61 (4.08, 7.34)            | 493.2 (358.9, 645.6)                             | 5.94 (4.34, 7.77)            | 0.04 (-0.01, 0.10)        |
| Other vision loss                | 21.10 (19.06, 23.56)                             | 0.52 (0.47, 0.58)            | 38.40 (34.35, 43.08)                             | 0.47 (0.43, 0.53)            | -0.38 (-0.42, -0.34)*     |

No., number; ASPR, age-standardized prevalence rate; UI, uncertainty interval; EAPC, estimated annual percentage change; CI, confidential interval; SDI, Socio-demographic Index; GBD, global burden of disease.

\* *P* value<0.05.

**Supplementary Table 2. Countries/territories with ASPR per 100 greater than 11 in 2019.**

| <b>Number</b> | <b>Location</b> | <b>ASPR per 100 No. (95% UI)</b> |
|---------------|-----------------|----------------------------------|
| 1             | Nepal           | 21.27 (18.16, 24.24)             |
| 2             | Tanzania        | 18.01 (14.90, 21.20)             |
| 3             | Zimbabwe        | 16.97 (13.31, 20.93)             |
| 4             | Lesotho         | 16.75 (13.16, 20.80)             |
| 5             | South Africa    | 16.45 (13.06, 20.13)             |
| 6             | Eswatini        | 16.27 (12.58, 20.19)             |
| 7             | Namibia         | 15.88 (12.24, 19.87)             |
| 8             | Botswana        | 15.78 (12.25, 19.56)             |
| 9             | Niger           | 15.41 (13.08, 17.92)             |
| 10            | India           | 15.29 (12.79, 18.05)             |
| 11            | Bangladesh      | 13.78 (11.39, 16.55)             |
| 12            | Nigeria         | 12.87 (10.63, 15.31)             |
| 13            | Pakistan        | 12.42 (10.87, 14.02)             |
| 14            | Bhutan          | 12.39 (9.74, 15.45)              |
| 15            | Somalia         | 12.39 (9.57, 15.43)              |
| 16            | Mozambique      | 11.96 (9.62, 14.61)              |
| 17            | Mali            | 11.95 (9.82, 14.52)              |
| 18            | Malawi          | 11.81 (9.49, 14.41)              |
| 19            | South Sudan     | 11.59 (9.33, 14.18)              |
| 20            | Burkina Faso    | 11.57 (9.36, 14.01)              |
| 21            | Eritrea         | 11.54 (9.29, 13.97)              |
| 22            | Guinea          | 11.45 (9.31, 14.02)              |
| 23            | Moldova         | 11.40 (9.29, 13.74)              |
| 24            | Guinea-Bissau   | 11.39 (9.31, 13.83)              |
| 25            | Chad            | 11.38 (9.23, 13.87)              |
| 26            | Madagascar      | 11.14 (8.80, 13.74)              |
| 27            | Benin           | 11.07 (8.98, 13.36)              |
| 28            | Comoros         | 11.07 (8.81, 13.53)              |
| 29            | Gambia          | 11.05 (8.99, 13.56)              |

ASPR, age-standardized prevalence rate; No., number; UI, uncertainty interval.

**Supplementary Table 3. Countries/territories with age-standardized DALYs rate per 1000 greater than 3.8 in 2019.**

| <b>Number</b> | <b>Location</b> | <b>Age-standardized DALYs rate per 1000 No. (95% UI)</b> |
|---------------|-----------------|----------------------------------------------------------|
| 1             | Indonesia       | 5.59 (4.04, 7.48)                                        |
| 2             | Pakistan        | 5.39 (3.85, 7.30)                                        |
| 3             | India           | 5.25 (3.66, 7.27)                                        |
| 4             | Mali            | 5.13 (3.62, 7.02)                                        |
| 5             | Timor-Leste     | 4.99 (3.52, 6.81)                                        |
| 6             | Nepal           | 4.78 (3.14, 7.20)                                        |
| 7             | Tanzania        | 4.75 (3.21, 6.73)                                        |
| 8             | Afghanistan     | 4.70 (3.33, 6.33)                                        |
| 9             | Nigeria         | 4.68 (3.30, 6.47)                                        |
| 10            | Saudi Arabia    | 4.65 (3.32, 6.22)                                        |
| 11            | Oman            | 4.55 (3.26, 6.15)                                        |
| 12            | Bangladesh      | 4.48 (3.06, 6.33)                                        |
| 13            | Cambodia        | 4.47 (3.17, 6.12)                                        |
| 14            | Niger           | 4.34 (2.99, 6.05)                                        |
| 15            | Lesotho         | 4.23 (2.88, 6.11)                                        |
| 16            | Myanmar         | 4.21 (2.96, 5.75)                                        |
| 17            | Ethiopia        | 4.21 (3.03, 5.69)                                        |
| 18            | Zimbabwe        | 4.20 (2.87, 6.20)                                        |
| 19            | Guinea-Bissau   | 4.18 (2.94, 5.82)                                        |
| 20            | Guinea          | 4.04 (2.80, 5.60)                                        |
| 21            | Senegal         | 3.96 (2.79, 5.47)                                        |
| 22            | Burkina Faso    | 3.94 (2.76, 5.45)                                        |
| 23            | Eswatini        | 3.91 (2.66, 5.76)                                        |
| 24            | South Sudan     | 3.87 (2.70, 5.35)                                        |
| 25            | Eritrea         | 3.86 (2.68, 5.35)                                        |
| 26            | Botswana        | 3.83 (2.63, 5.65)                                        |
| 27            | Mozambique      | 3.81 (2.66, 5.28)                                        |
| 28            | Guatemala       | 3.80 (2.65, 5.21)                                        |

DALYs, disability-adjusted life years; No., number; UI, uncertainty interval.

**Supplementary Table 4. Top 20 countries/territories with the most rapid decrease in age-standardized DALYs rate from 1990 to 2019.**

| Number | Location          | Age-standardized DALYs rate per 1000 in 1990 No. (95% UI) | Age-standardized DALYs rate per 1000 in 2019 No. (95% UI) | EAPC in age-standardized DALYs rate No. (95% CI) |
|--------|-------------------|-----------------------------------------------------------|-----------------------------------------------------------|--------------------------------------------------|
| 1      | Equatorial Guinea | 6.25 (4.44, 8.41)                                         | 3.34 (2.33, 4.63)                                         | -2.45 (-2.59, -2.31)                             |
| 2      | Saudi Arabia      | 8.04 (5.73, 10.77)                                        | 4.65 (3.32, 6.22)                                         | -1.85 (-1.91, -1.78)                             |
| 3      | Cambodia          | 6.45 (4.54, 8.72)                                         | 4.47 (3.17, 6.12)                                         | -1.44 (-1.52, -1.36)                             |
| 4      | Qatar             | 4.10 (2.92, 5.49)                                         | 2.87 (2.02, 3.94)                                         | -1.29 (-1.35, -1.23)                             |
| 5      | Tunisia           | 3.97 (2.81, 5.39)                                         | 2.79 (1.97, 3.78)                                         | -1.26 (-1.33, -1.20)                             |
| 6      | Malaysia          | 4.35 (3.07, 5.90)                                         | 3.14 (2.20, 4.35)                                         | -1.14 (-1.17, -1.10)                             |
| 7      | Vietnam           | 4.18 (2.96, 5.71)                                         | 3.09 (2.15, 4.34)                                         | -1.11 (-1.16, -1.07)                             |
| 8      | Bhutan            | 3.91 (2.68, 5.69)                                         | 2.90 (1.91, 4.31)                                         | -1.10 (-1.15, -1.05)                             |
| 9      | Thailand          | 3.77 (2.59, 5.26)                                         | 2.83 (1.92, 4.10)                                         | -1.10 (-1.16, -1.05)                             |
| 10     | Peru              | 4.56 (3.24, 6.19)                                         | 3.54 (2.47, 4.91)                                         | -1.07 (-1.17, -0.98)                             |
| 11     | Lebanon           | 4.15 (2.94, 5.61)                                         | 3.08 (2.16, 4.19)                                         | -1.06 (-1.09, -1.03)                             |
| 12     | Syria             | 4.45 (3.15, 5.95)                                         | 3.31 (2.34, 4.51)                                         | -1.05 (-1.12, -0.98)                             |
| 13     | Bahrain           | 3.84 (2.74, 5.17)                                         | 2.87 (2.01, 3.92)                                         | -1.04 (-1.10, -0.99)                             |
| 14     | Myanmar           | 5.40 (3.87, 7.34)                                         | 4.21 (2.96, 5.75)                                         | -1.01 (-1.13, -0.88)                             |
| 15     | Sudan             | 5.10 (3.66, 6.87)                                         | 3.73 (2.67, 5.03)                                         | -1.01 (-1.08, -0.95)                             |
| 16     | Iraq              | 4.16 (2.96, 5.58)                                         | 3.16 (2.24, 4.30)                                         | -1.01 (-1.06, -0.97)                             |
| 17     | India             | 6.95 (4.97, 9.48)                                         | 5.25 (3.66, 7.27)                                         | -0.98 (-1.02, -0.93)                             |
| 18     | Botswana          | 5.06 (3.47, 7.03)                                         | 3.83 (2.63, 5.65)                                         | -0.97 (-0.99, -0.94)                             |
| 19     | Palestine         | 4.07 (2.91, 5.52)                                         | 2.99 (2.11, 4.10)                                         | -0.97 (-1.04, -0.90)                             |
| 20     | Jordan            | 3.11 (2.21, 4.23)                                         | 2.41 (1.68, 3.34)                                         | -0.97 (-1.00, -0.93)                             |

DALYs, disability-adjusted life years; No., number; CI, confidence interval.

**Supplementary Table 5. Countries/territories with the increased age-standardized DALYs rate from 1990 to 2019.**

| Number | Location                 | Age-standardized DALYs rate per 1000 in 1990 No. (95% UI) | Age-standardized DALYs rate per 1000 in 2019 No. (95% UI) | EAPC in age-standardized DALYs rate No. (95% CI) |
|--------|--------------------------|-----------------------------------------------------------|-----------------------------------------------------------|--------------------------------------------------|
| 1      | Burkina Faso             | 2.91 (2.00, 4.19)                                         | 3.94 (2.76, 5.45)                                         | 0.63 (0.35, 0.91)                                |
| 2      | Cote d'Ivoire            | 2.43 (1.65, 3.57)                                         | 3.74 (2.60, 5.21)                                         | 0.54 (0.06, 1.02)                                |
| 3      | Benin                    | 3.04 (2.09, 4.40)                                         | 3.66 (2.52, 5.10)                                         | 0.52 (0.37, 0.67)                                |
| 4      | Central African Republic | 2.20 (1.45, 3.34)                                         | 2.31 (1.53, 3.39)                                         | 0.22 (0.19, 0.26)                                |
| 5      | Chad                     | 3.69 (2.56, 5.18)                                         | 3.75 (2.60, 5.18)                                         | 0.10 (0.01, 0.20)                                |
| 6      | Somalia                  | 3.54 (2.46, 5.01)                                         | 3.45 (2.38, 4.87)                                         | 0.09 (0.03, 0.15)                                |

DALYs, disability-adjusted life years; No., number; CI, confidence interval.

**Supplementary Table 6. Top 20 countries/territories where the proportion of glaucoma-related DALYs attributable to high fasting plasma glucose increased between 1990 to 2019.**

| <b>Number</b> | <b>Location</b>        | <b>Proportion in 1990</b> | <b>Proportion in 2019</b> | <b>Proportion change</b> |
|---------------|------------------------|---------------------------|---------------------------|--------------------------|
| 1             | Luxembourg             | 4.40%                     | 13.66%                    | 9.26%                    |
| 2             | Seychelles             | 9.48%                     | 18.17%                    | 8.69%                    |
| 3             | Qatar                  | 16.94%                    | 25.21%                    | 8.28%                    |
| 4             | Bahrain                | 15.83%                    | 24.09%                    | 8.26%                    |
| 5             | Mauritius              | 10.86%                    | 18.97%                    | 8.10%                    |
| 6             | Sri Lanka              | 10.54%                    | 18.30%                    | 7.76%                    |
| 7             | Micronesia             | 8.76%                     | 15.69%                    | 6.93%                    |
| 8             | Libya                  | 9.63%                     | 16.33%                    | 6.70%                    |
| 9             | Fiji                   | 14.78%                    | 21.38%                    | 6.60%                    |
| 10            | Cambodia               | 5.23%                     | 11.65%                    | 6.42%                    |
| 11            | Palestine              | 9.37%                     | 15.75%                    | 6.38%                    |
| 12            | Niue                   | 13.22%                    | 19.54%                    | 6.32%                    |
| 13            | Marshall Islands       | 15.00%                    | 21.16%                    | 6.16%                    |
| 14            | Ireland                | 3.63%                     | 9.70%                     | 6.07%                    |
| 15            | Solomon Islands        | 7.84%                     | 13.86%                    | 6.02%                    |
| 16            | Afghanistan            | 8.37%                     | 14.36%                    | 5.98%                    |
| 17            | Sudan                  | 7.61%                     | 13.56%                    | 5.95%                    |
| 18            | Czech                  | 10.20%                    | 16.13%                    | 5.93%                    |
| 19            | Tunisia                | 9.44%                     | 15.36%                    | 5.92%                    |
| 20            | Bosnia and Herzegovina | 7.61%                     | 13.51%                    | 5.90%                    |

DALYs, disability-adjusted life years.

**Supplementary Table 7. Countries/regions where the proportion of DALYs in age-related macular degeneration attributable to smoking increased between 1990 to 2019.**

| <b>Number</b> | <b>Location</b>        | <b>Proportion in 1990</b> | <b>Proportion in 2019</b> | <b>Proportion change</b> |
|---------------|------------------------|---------------------------|---------------------------|--------------------------|
| 1             | Bosnia and Herzegovina | 16.42%                    | 21.38%                    | 4.96%                    |
| 2             | Russian                | 8.43%                     | 12.05%                    | 3.62%                    |
| 3             | Lebanon                | 19.13%                    | 22.65%                    | 3.52%                    |
| 4             | Austria                | 12.01%                    | 14.86%                    | 2.85%                    |
| 5             | Serbia                 | 16.03%                    | 18.69%                    | 2.66%                    |
| 6             | Egypt                  | 10.18%                    | 12.83%                    | 2.64%                    |
| 7             | Montenegro             | 20.68%                    | 23.28%                    | 2.60%                    |
| 8             | North Korea            | 6.94%                     | 9.40%                     | 2.47%                    |
| 9             | Kiribati               | 17.12%                    | 19.23%                    | 2.11%                    |
| 10            | Azerbaijan             | 7.21%                     | 8.97%                     | 1.77%                    |
| 11            | Mali                   | 2.39%                     | 4.16%                     | 1.76%                    |
| 12            | Afghanistan            | 3.52%                     | 5.11%                     | 1.59%                    |
| 13            | Rwanda                 | 7.91%                     | 9.46%                     | 1.55%                    |
| 14            | Qatar                  | 8.55%                     | 10.08%                    | 1.53%                    |
| 15            | China                  | 13.13%                    | 14.59%                    | 1.46%                    |
| 16            | Guinea                 | 4.94%                     | 6.33%                     | 1.39%                    |
| 17            | Albania                | 15.70%                    | 16.96%                    | 1.26%                    |
| 18            | Estonia                | 11.66%                    | 12.91%                    | 1.25%                    |
| 19            | Moldova                | 11.70%                    | 12.63%                    | 0.94%                    |
| 20            | Antigua and Barbuda    | 4.58%                     | 5.40%                     | 0.82%                    |
| 21            | Cote d'Ivoire          | 4.56%                     | 5.38%                     | 0.82%                    |
| 22            | United Arab Emirates   | 8.35%                     | 9.14%                     | 0.79%                    |
| 23            | Georgia                | 8.10%                     | 8.77%                     | 0.67%                    |
| 24            | Indonesia              | 9.43%                     | 10.09%                    | 0.66%                    |
| 25            | Saudi Arabia           | 7.55%                     | 8.20%                     | 0.65%                    |
| 26            | Niger                  | 1.21%                     | 1.78%                     | 0.57%                    |
| 27            | Sao Tome and Principe  | 2.48%                     | 2.93%                     | 0.45%                    |
| 28            | Kyrgyzstan             | 8.71%                     | 8.95%                     | 0.24%                    |
| 29            | Uzbekistan             | 4.48%                     | 4.71%                     | 0.22%                    |
| 30            | Bermuda                | 6.98%                     | 7.19%                     | 0.21%                    |
| 31            | Gabon                  | 2.65%                     | 2.77%                     | 0.12%                    |
| 32            | Vietnam                | 10.44%                    | 10.49%                    | 0.05%                    |
| 33            | Malawi                 | 5.14%                     | 5.17%                     | 0.02%                    |

DALYs, disability-adjusted life years.

**Supplementary Table 8. Top 20 countries/regions where the proportion of DALYs in age-related macular degeneration attributable to smoking decreased between 1990 to 2019.**

| <b>Number</b> | <b>Location</b>   | <b>Proportion in 1990</b> | <b>Proportion in 2019</b> | <b>Proportion change</b> |
|---------------|-------------------|---------------------------|---------------------------|--------------------------|
| 1             | Myanmar           | 18.73%                    | 8.40%                     | -10.33%                  |
| 2             | Canada            | 21.32%                    | 12.00%                    | -9.32%                   |
| 3             | Netherlands       | 21.73%                    | 12.46%                    | -9.27%                   |
| 4             | Ireland           | 22.09%                    | 12.92%                    | -9.17%                   |
| 5             | New Zealand       | 16.86%                    | 8.25%                     | -8.61%                   |
| 6             | Brazil            | 18.33%                    | 9.86%                     | -8.47%                   |
| 7             | South Africa      | 13.68%                    | 6.21%                     | -7.47%                   |
| 8             | United Kingdom    | 19.47%                    | 12.48%                    | -7.00%                   |
| 9             | USA               | 19.00%                    | 12.14%                    | -6.86%                   |
| 10            | Venezuela         | 12.82%                    | 6.21%                     | -6.60%                   |
| 11            | Iceland           | 19.18%                    | 12.71%                    | -6.47%                   |
| 12            | Thailand          | 15.17%                    | 8.78%                     | -6.39%                   |
| 13            | Mexico            | 11.67%                    | 5.40%                     | -6.27%                   |
| 14            | Australia         | 14.57%                    | 8.69%                     | -5.88%                   |
| 15            | Brunei Darussalam | 14.49%                    | 8.75%                     | -5.74%                   |
| 16            | Japan             | 18.08%                    | 12.50%                    | -5.58%                   |
| 17            | Croatia           | 22.47%                    | 16.95%                    | -5.52%                   |
| 18            | Colombia          | 10.70%                    | 5.29%                     | -5.41%                   |
| 19            | Denmark           | 23.31%                    | 17.99%                    | -5.32%                   |
| 20            | Sri Lanka         | 9.59%                     | 4.41%                     | -5.18%                   |

DALYs, disability-adjusted life years.
